# Supplementary material for: Subacute thyroiditis following COVID-19: A systematic review
Source: PubMed Central journal article supplement (PMC10115182; doi:10.3389/fendo.2023.1126637), 2023-04-05
Supplement: DataSheet_1.pdf [file DataSheet_1.pdf]

## *Supplementary Material*

**Supplementary Table 1. Symptoms and comorbidities of the patients**

| <b>Variable</b>            | <b>Number of patients (%)</b> |
|----------------------------|-------------------------------|
| <b>COVID-19 symptoms</b>   |                               |
| <b>Fever</b>               | 27 (36)                       |
| <b>Cough</b>               | 20 (27)                       |
| <b>Fatigue or weakness</b> | 14 (19)                       |
| <b>Myalgia</b>             | 12 (16)                       |
| <b>Dyspnea</b>             | 12 (16)                       |
| <b>Asymptomatic</b>        | 10 (13)                       |
| <b>Anosmia</b>             | 8 (11)                        |
| <b>Sore throat</b>         | 7 (9)                         |

|                                             |       |
|---------------------------------------------|-------|
| <b>Headache</b>                             | 7 (9) |
| <b>Rhinorrhea</b>                           | 4 (5) |
| <b>Diarrhea</b>                             | 4 (5) |
| <b>Coryza</b>                               | 4 (5) |
| <b>Odynophagia or dysphagia</b>             | 4 (5) |
| <b>Anorexia</b>                             | 2 (3) |
| <b>Tachycardia</b>                          | 2 (3) |
| <b>Undefined upper respiratory symptoms</b> | 2 (2) |
| <b>Chest discomfort</b>                     | 2 (2) |
| <b>Flu-like symptoms</b>                    | 1 (1) |
| <b>Hypoxia</b>                              | 1 (1) |
| <b>Tachypnea</b>                            | 1 (1) |
| <b>Weight loss</b>                          | 1 (1) |

|                                      |         |
|--------------------------------------|---------|
| <b>Sleepiness</b>                    | 1 (1)   |
| <b>Apathy</b>                        | 1 (1)   |
| <b>Subacute thyroiditis symptoms</b> |         |
| <b>Neck pain</b>                     | 69 (69) |
| <b>Fever</b>                         | 54 (54) |
| <b>Fatigue or weakness</b>           | 34 (34) |
| <b>Persistent palpitations</b>       | 31 (31) |
| <b>Tachycardia</b>                   | 15 (15) |
| <b>Sweating</b>                      | 14 (14) |
| <b>Thyroid enlargement</b>           | 14 (14) |
| <b>Weight loss</b>                   | 8 (8)   |
| <b>Tremor</b>                        | 8 (8)   |
| <b>Myalgia</b>                       | 7 (7)   |
| <b>Sore throat</b>                   | 6 (6)   |

|                         |       |
|-------------------------|-------|
| <b>Cough</b>            | 5 (5) |
| <b>Odynophagia</b>      | 5 (5) |
| <b>Diarrhea</b>         | 4 (4) |
| <b>Insomnia</b>         | 4 (4) |
| <b>Dysphagia</b>        | 3 (3) |
| <b>Chills</b>           | 3 (3) |
| <b>Heat intolerance</b> | 3 (3) |
| <b>Irritability</b>     | 3 (3) |
| <b>Agitation</b>        | 3 (3) |
| <b>Anxiety</b>          | 1 (1) |
| <b>Mood changes</b>     | 1 (1) |
| <b>Alopecia</b>         | 1 (1) |
| <b>Staring</b>          | 1 (1) |
| <b>Delirium</b>         | 1 (1) |

|                               |       |
|-------------------------------|-------|
| <b>Feeling of suffocation</b> | 1 (1) |
| <b>Abdominal pain</b>         | 1 (1) |
| <b>Back pain</b>              | 1 (1) |
| <b>Hot flashes</b>            | 1 (1) |
| <b>Asymptomatic</b>           | 1 (1) |

---

**Comorbidities**

|                                 |         |
|---------------------------------|---------|
| <b>Not reported</b>             | 79 (79) |
| <b>None</b>                     | 11 (11) |
| <b>Hypertension</b>             | 4 (4)   |
| <b>Diabetes</b>                 | 3 (3)   |
| <b>Anxiety</b>                  | 2 (2)   |
| <b>Chronic kidney disease</b>   | 2 (2)   |
| <b>Depression</b>               | 2 (2)   |
| <b>Non-toxic nodular goiter</b> | 1 (1)   |

|                                             |       |
|---------------------------------------------|-------|
| <b>Anemia</b>                               | 1 (1) |
| <b>Atrial fibrillation</b>                  | 1 (1) |
| <b>Coronary artery disease</b>              | 1 (1) |
| <b>Treated supraventricular tachycardia</b> | 1 (1) |
| <b>Treated scoliosis</b>                    | 1 (1) |
| <b>Asthma</b>                               | 1 (1) |
| <b>Gastroesophageal reflux disease</b>      | 1 (1) |
| <b>Glomerulonephritis</b>                   | 1 (1) |
| <b>Breast cancer</b>                        | 1 (1) |

**Supplementary Table 2. Baseline and COVID-19 characteristics of the patients**

| Reference | Case Number | Author            | Country | Document type | Number of patients | Quality assessment score | Setting    | Gender | Age (years) | Comorbidities | Symptoms of COVID-19                                        | PCR                                        |
|-----------|-------------|-------------------|---------|---------------|--------------------|--------------------------|------------|--------|-------------|---------------|-------------------------------------------------------------|--------------------------------------------|
| (1)       | 1           | Feghali et al.    | USA     | Case report   | 1                  | 3                        | Outpatient | Female | 41          | NR            | Headache, fatigue, anorexia, and mild fever                 | Positive                                   |
| (2)       | 2           | Sohrabpour et al. | Iran    | Case report   | 6                  | 5                        | Outpatient | Female | 26          | NR            | Dry cough                                                   | Negative, but Positive Serology (IgM, IgG) |
| (2)       | 3           | Sohrabpour et al. | —       | —             | —                  | —                        | Outpatient | Female | 37          | NR            | Myalgia                                                     | Negative, but Positive Serology (IgM, IgG) |
| (2)       | 4           | Sohrabpour et al. | —       | —             | —                  | —                        | Outpatient | Male   | 35          | NR            | Asymptomatic                                                | Negative, but Positive Serology (IgM, IgG) |
| (2)       | 5           | Sohrabpour et al. | —       | —             | —                  | —                        | Outpatient | Female | 41          | NR            | Mild fever and myalgia                                      | Negative, but Positive Serology (IgM, IgG) |
| (2)       | 6           | Sohrabpour et al. | —       | —             | —                  | —                        | Outpatient | Male   | 52          | NR            | Dry cough, mild myalgia, and fever                          | Negative, but Positive Serology (IgM, IgG) |
| (2)       | 7           | Sohrabpour et al. | —       | —             | —                  | —                        | Outpatient | Female | 34          | NR            | Asymptomatic                                                | Negative, but Positive Serology (IgM, IgG) |
| (3)       | 8           | Osorio et al.     | Mexico  | Case report   | 1                  | 8                        | Inpatient  | Male   | 64          | None          | High fever, productive cough, headache, and extreme fatigue | Positive                                   |

Supplementary Material

|             |       |                                  |        |             |    |   |            |        |          |                                                                                                                                                                                             |                                   |                                      |
|-------------|-------|----------------------------------|--------|-------------|----|---|------------|--------|----------|---------------------------------------------------------------------------------------------------------------------------------------------------------------------------------------------|-----------------------------------|--------------------------------------|
| <b>(4)</b>  | 9     | Ippolito et al.                  | Italy  | Case report | 1  | 7 | Inpatient  | Female | 69       | Recent back surgery, non-toxic nodular goiter with a dominant euthyroid right lobe nodule                                                                                                   | Mild fever, cough, and dyspnea    | Positive                             |
| <b>(5)</b>  | 10    | Ünüböl et al.                    | Turkey | Case report | 2  | 6 | Outpatient | Male   | 56       | NR                                                                                                                                                                                          | Mild fever, cough, and myalgia    | Positive                             |
| <b>(5)</b>  | 11    | Ünüböl et al.                    | —      | —           | —  | — | Outpatient | Female | 38       | NR                                                                                                                                                                                          | Sore throat                       | Positive                             |
| <b>(6)</b>  | 12    | Ayhan and Guner                  | Turkey | Case report | 1  | 7 | Outpatient | Male   | 39       | None                                                                                                                                                                                        | Sore throat, fatigue, and fever   | Positive                             |
| <b>(7)</b>  | 13-30 | Brancatella et al.               | Italy  | Case series | 18 | 8 | Outpatient | Female | 34 (±14) | NR                                                                                                                                                                                          | NR                                | Positive                             |
| <b>(8)</b>  | 31    | de la Higuera Lopez-Frias et al. | Spain  | Case report | 1  | 7 | Outpatient | Female | 36       | None                                                                                                                                                                                        | Fever and myalgia                 | NR, but Positive Serology (IgM, IgG) |
| <b>(9)</b>  | 32    | Khatri et al.                    | USA    | Case report | 1  | 7 | Inpatient  | Female | 41       | Supraventricular tachycardia treated with ablation, anxiety, depression, treated Helicobacter pylori infection, anemia, surgically corrected scoliosis, and gastroesophageal reflux disease | Fever, cough, and coryza          | Positive                             |
| <b>(10)</b> | 33    | Ruano et al.                     | Spain  | Case report | 1  | 7 | Inpatient  | Female | 28       | None                                                                                                                                                                                        | Diarrhea and abdominal pain       | Positive                             |
| <b>(11)</b> | 34    | Baykan and Carlioglu             | Turkey | Case report | 5  | 5 | Outpatient | Female | 51       | NR                                                                                                                                                                                          | Odynophagia, myalgia, and anosmia | Positive                             |
| <b>(11)</b> | 35    | Baykan and Carlioglu             | —      | —           | —  | — | Outpatient | Male   | 39       | NR                                                                                                                                                                                          | Mild fever, cough, and dyspnea    | Positive                             |



|             |    |                       |           |             |   |   |            |        |    |                                                                                                                   |                                         |          |
|-------------|----|-----------------------|-----------|-------------|---|---|------------|--------|----|-------------------------------------------------------------------------------------------------------------------|-----------------------------------------|----------|
| <b>(11)</b> | 36 | Baykan and Carlioglu  | —         | —           | — | — | Outpatient | Female | 31 | NR                                                                                                                | Mild upper respiratory symptoms         | Positive |
| <b>(11)</b> | 37 | Baykan and Carlioglu  | —         | —           | — | — | Outpatient | Female | 27 | NR                                                                                                                | Myalgia, weakness, and fever            | Positive |
| <b>(11)</b> | 38 | Baykan and Carlioglu  | —         | —           | — | — | Outpatient | Male   | 47 | NR                                                                                                                | Mild fever, myalgia, and cough          | Positive |
| <b>(12)</b> | 39 | Abreu et al.          | Brazil    | Case report | 3 | 6 | Outpatient | Female | 34 | Breast cancer                                                                                                     | Dyspnea                                 | Positive |
| <b>(12)</b> | 40 | Abreu et al.          | —         | —           | — | — | Outpatient | Female | 34 | NR                                                                                                                | Dyspnea                                 | Positive |
| <b>(12)</b> | 41 | Abreu et al.          | —         | —           | — | — | Outpatient | Female | 39 | NR                                                                                                                | Mild fever and anosmia                  | Positive |
| <b>(13)</b> | 42 | Mathews et al.        | USA       | Case report | 1 | 7 | Inpatient  | Male   | 67 | Heart failure, coronary artery disease, diabetes mellitus type 2, chronic kidney disease, and atrial fibrillation | Shortness of breath and diarrhea        | Positive |
| <b>(14)</b> | 43 | Brancatella et al.    | Italy     | Case report | 1 | 6 | Outpatient | Female | 18 | NR                                                                                                                | Rhinorrhea and cough                    | Positive |
| <b>(15)</b> | 44 | Chakraborty et al.    | India     | Case report | 1 | 7 | Outpatient | Male   | 58 | Diabetes                                                                                                          | Sore throat and mild fever              | Positive |
| <b>(16)</b> | 45 | Campos-Barrera et al. | Mexico    | Case report | 1 | 6 | Outpatient | Female | 37 | None                                                                                                              | Odynophagia and anosmia                 | Positive |
| <b>(17)</b> | 46 | Mattar et al.         | Singapore | Case report | 1 | 7 | Inpatient  | Male   | 34 | NR                                                                                                                | Fever, dry cough, headache, and anosmia | Positive |

Supplementary Material

|             |    |                       |        |             |   |   |            |        |                |  |                                                                                |                                                              |                                 |
|-------------|----|-----------------------|--------|-------------|---|---|------------|--------|----------------|--|--------------------------------------------------------------------------------|--------------------------------------------------------------|---------------------------------|
| <b>(18)</b> | 47 | Timofeeva et al.      | Russia | Case report | 1 | 7 | Outpatient | Male   | 56             |  | NR                                                                             | Dry cough, fever, dyspnea, apathy, and fatigue               | Positive                        |
| <b>(19)</b> | 48 | Guven                 | Turkey | Case report | 1 | 7 | Outpatient | Male   | 49             |  | None                                                                           | Cough and shortness of breath                                | Positive                        |
| <b>(20)</b> | 49 | Chong et al.          | USA    | Case report | 1 | 6 | Outpatient | Male   | 37             |  | NR                                                                             | Cough, fever, chills, and dyspnea                            | Positive                        |
| <b>(21)</b> | 50 | Semikov et al.        | Russia | Case report | 2 | 6 | Outpatient | Female | 45             |  | NR                                                                             | Nasal congestion, cough, weakness, muscle pain, and headache | Positive                        |
| <b>(21)</b> | 51 | Semikov et al.        | —      | —           | — | — | Outpatient | Female | 40             |  | NR                                                                             | Mild symptoms                                                | Positive                        |
| <b>(22)</b> | 52 | Kong and La Porteb    | UK     | Case report | 1 | 7 | Outpatient | Male   | 44             |  | Hypertension, chronic glomerulonephritis, and stage III chronic kidney disease | Shortness of breath, loose stools, fatigue, and hypoxia      | Positive                        |
| <b>(23)</b> | 53 | Tjønnfjord et al.     | Norway | Case report | 1 | 7 | Inpatient  | Male   | in his forties |  | NR                                                                             | Mild fever, cough, and dyspnea                               | Positive                        |
| <b>(24)</b> | 54 | Álvarez Martín et al. | Spain  | Case report | 1 | 7 | Outpatient | Female | 46             |  | NR                                                                             | Asymptomatic                                                 | Negative, but Positive Serology |
| <b>(25)</b> | 55 | Davoodi et al.        | Iran   | Case report | 1 | 6 | Inpatient  | Male   | 33             |  | NR                                                                             | Fever, sore throat, myalgia, and lethargy                    | Positive                        |
| <b>(26)</b> | 56 | Stasiak et al.        | Poland | Case report | 4 | 6 | Outpatient | Male   | 50             |  | NR                                                                             | Cough, fever, headache, malaise, anosmia, chest discomfort   | Positive                        |
| <b>(26)</b> | 57 | Stasiak et al.        | —      | —           | — | — | Outpatient | Female | 39             |  | NR                                                                             | Fever, cough, headache, and malaise                          | Positive                        |

|      |    |                         |             |             |   |   |            |        |    |        |                                                                       |                                            |
|------|----|-------------------------|-------------|-------------|---|---|------------|--------|----|--------|-----------------------------------------------------------------------|--------------------------------------------|
| (26) | 58 | Stasiak et al.          | —           | —           | — | — | Outpatient | Female | 55 | NR     | Moderate symptoms                                                     | Positive                                   |
| (26) | 59 | Stasiak et al.          | —           | —           | — | — | Outpatient | Female | 57 | NR     | Mild symptoms                                                         | Positive                                   |
| (27) | 60 | Brancatella et al.      | Italy       | Case report | 3 | 7 | Outpatient | Female | 38 | NR     | Respiratory symptoms                                                  | Positive                                   |
| (27) | 61 | Brancatella et al.      | —           | —           | — | — | Outpatient | Female | 29 | NR     | Rhinorrhea                                                            | Positive                                   |
| (27) | 62 | Brancatella et al.      | —           | —           | — | — | Outpatient | Female | 46 | NR     | Fever, cough, rhinorrhea, anosmia, asthenia, and weight loss          | Positive                                   |
| (28) | 63 | Sato et al.             | Japan       | Case report | 1 | 7 | Outpatient | Female | 31 | NR     | Mild fever and sore throat                                            | Positive                                   |
| (29) | 64 | San Juan et al.         | Philippines | Case report | 1 | 6 | Inpatient  | Female | 47 | Asthma | NR                                                                    | Positive                                   |
| (30) | 65 | Ruggeri et al.          | Greece      | Case report | 1 | 7 | Inpatient  | Female | 43 | NR     | Fever, rhinorrhea, odynophagia, cough, hoarseness, and conjunctivitis | Positive                                   |
| (31) | 66 | Mehmood et al.          | Pakistan    | Case report | 1 | 7 | Inpatient  | Female | 29 | None   | NR                                                                    | Negative, but Positive Serology (IgM, IgG) |
| (32) | 67 | Seyed Resuli and Bezgal | Turkey      | Case report | 5 | 5 | Inpatient  | Female | 32 | NR     | Asymptomatic                                                          | Positive                                   |
| (32) | 68 | Seyed Resuli and Bezgal | —           | —           | — | — | Inpatient  | Female | 25 | NR     | Asymptomatic                                                          | Positive                                   |
| (32) | 69 | Seyed Resuli and Bezgal | —           | —           | — | — | Inpatient  | Female | 45 | NR     | Asymptomatic                                                          | Positive                                   |

Supplementary Material

|      |    |                         |        |             |   |   |            |        |    |                                                         |                   |                                            |
|------|----|-------------------------|--------|-------------|---|---|------------|--------|----|---------------------------------------------------------|-------------------|--------------------------------------------|
| (32) | 70 | Seyed Resuli and Bezgal | —      | —           | — | — | Inpatient  | Female | 29 | NR                                                      | Asymptomatic      | Positive                                   |
| (32) | 71 | Seyed Resuli and Bezgal | —      | —           | — | — | Inpatient  | Female | 21 | NR                                                      | Asymptomatic      | Positive                                   |
| (33) | 72 | Bahçecioğlu et al.      | Turkey | Case series | 9 | 8 | Outpatient | Male   | 40 | NR                                                      | Mild symptoms     | Negative, but Positive Serology (IgM, IgG) |
| (33) | 73 | Bahçecioğlu et al.      | —      | —           | — | — | Outpatient | Female | 54 | NR                                                      | Mild symptoms     | Negative, but Positive Serology (IgM, IgG) |
| (33) | 74 | Bahçecioğlu et al.      | —      | —           | — | — | Outpatient | Male   | 52 | NR                                                      | Mild symptoms     | Negative, but Positive Serology (IgM, IgG) |
| (33) | 75 | Bahçecioğlu et al.      | —      | —           | — | — | Outpatient | Male   | 37 | NR                                                      | Mild symptoms     | Negative, but Positive Serology (IgM, IgG) |
| (33) | 76 | Bahçecioğlu et al.      | —      | —           | — | — | Outpatient | Male   | 51 | NR                                                      | Mild symptoms     | Negative, but Positive Serology (IgM, IgG) |
| (33) | 77 | Bahçecioğlu et al.      | —      | —           | — | — | Outpatient | Female | 36 | NR                                                      | Mild symptoms     | Negative, but Positive Serology (IgM, IgG) |
| (33) | 78 | Bahçecioğlu et al.      | —      | —           | — | — | Outpatient | Female | 53 | NR                                                      | Mild symptoms     | Positive                                   |
| (33) | 79 | Bahçecioğlu et al.      | —      | —           | — | — | Outpatient | Male   | 50 | NR                                                      | Mild symptoms     | Positive                                   |
| (33) | 80 | Bahçecioğlu et al.      | —      | —           | — | — | Outpatient | Female | 48 | NR                                                      | Moderate symptoms | Negative, but Positive Serology (IgM, IgG) |
| (34) | 81 | Elawady et al.          | Egypt  | Case report | 1 | 6 | Outpatient | Female | 33 | Depression, anxiety, and pregnancy induced hypertension | Flu-like symptoms | Positive                                   |

|      |       |                          |          |             |    |   |            |                             |                          |                           |              |                                                                                                                                                                               |                                      |
|------|-------|--------------------------|----------|-------------|----|---|------------|-----------------------------|--------------------------|---------------------------|--------------|-------------------------------------------------------------------------------------------------------------------------------------------------------------------------------|--------------------------------------|
| (35) | 82    | Jakovac et al.           | Croatia  | Case report | 1  | 2 | Inpatient  | Male                        | 85                       |                           | NR           | Tachypnea, tachycardia, hypotension, and cyanosis                                                                                                                             | Positive                             |
| (36) | 83    | Salehi et al.            | Iran     | Case report | 1  | 7 | Outpatient | Male                        | 55                       |                           | None         | Cough                                                                                                                                                                         | Positive                             |
| (37) | 84    | Hajósi-Kalcakosz et al.  | Budapest | Case report | 1  | 7 | NA         | Female                      | 31                       |                           | None         | Fever, headache, myalgia, sleepiness, anosmia, and ageusia                                                                                                                    | Positive                             |
| (38) | 85    | Ashraf et al.            | Pakistan | Case report | 1  | 7 | Inpatient  | Male                        | 58                       | Diabetes and hypertension |              | Fever, myalgia, and fatigue                                                                                                                                                   | Positive                             |
| (39) | 86-96 | Mondal et al.            | India    | Case series | 11 | 8 | Inpatient  | Mainly female (n=7, 63.63%) | Mean (SD): 44.09 (16.62) |                           | NR           | One asymptomatic, five moderate, and five severe symptoms of COVID-19                                                                                                         | Positive                             |
| (40) | 97    | Kleim et al.             | Germany  | Case report | 1  | 6 | Inpatient  | Male                        | 44                       |                           | NR           | Chills and physical exhaustion                                                                                                                                                | Positive                             |
| (41) | 98    | Al-Shammaa and Abdlkadir | Iraq     | Case report | 1  | 6 | Outpatient | Female                      | 53                       |                           | None         | Fever and sore throat                                                                                                                                                         | Positive                             |
| (42) | 99    | Dolkar et al.            | USA      | Case report | 1  | 4 | Inpatient  | Female                      | 55                       |                           | Hypertension | Respiratory failure                                                                                                                                                           | Positive                             |
| (43) | 100   | Poudel Jaishi et al.     | Nepal    | Case report | 1  | 5 | Outpatient | Male                        | 45                       |                           | None         | Dyspnea, sweating, fatigue, sore throat, dysphagia, diarrhea, chest compression, anorexia, and tachycardia (undistinguishable from COVID-19 symptoms, because they coincided) | NR, but Positive Serology (IgM, IgG) |

NR: not reported; SD: standard deviation; n: number.

Supplementary Table 3. Subacute thyroiditis manifestations and management

| Reference | Case Number | Author            | Thyroiditis symptoms                                                                                   | Thyroid ultrasound         | Gap between respiratory and thyroid manifestations | Management                                                                  | Follow-up Duration | Outcome                                                                                                                  |
|-----------|-------------|-------------------|--------------------------------------------------------------------------------------------------------|----------------------------|----------------------------------------------------|-----------------------------------------------------------------------------|--------------------|--------------------------------------------------------------------------------------------------------------------------|
| (1)       | 1           | Feghali et al.    | Persistent palpitations and insomnia                                                                   | NR                         | 6 weeks                                            | Initial management NR, levothyroxine 112 µg daily for the hypothyroid phase | 3 weeks            | With a TSH 67.04 mIU/L and free T4 0.4 ng/dl after three weeks, levothyroxine 112 µg/day was started (final outcome NR). |
| (2)       | 2           | Sohrabpour et al. | High-grade fever, fatigue, palpitations, markedly painful, tender, and slightly enlarged thyroid gland | Bilateral hypoechoic areas | NR                                                 | Prednisolone 25 mg/day for 10 days, tapered in 4 weeks                      | 1 month            | Symptomatic relief after a week. After a month, laboratory test results were as follows: ESR 17, TSH 2.21, FT4 17.9.     |
| (2)       | 3           | Sohrabpour et al. | High-grade fever, fatigue, palpitations, markedly painful, tender, and slightly enlarged thyroid gland | Bilateral hypoechoic areas | NR                                                 | Prednisolone 25 mg/day for 10 days, tapered in 4 weeks                      | 1 month            | Symptomatic relief after a week. After a month, laboratory test results were as follows: ESR 4, TSH 1.83, FT4 19.3.      |
| (2)       | 4           | Sohrabpour et al. | High-grade fever, fatigue, palpitations, markedly painful, tender, and slightly enlarged thyroid gland | Bilateral hypoechoic areas | NR                                                 | Prednisolone 25 mg/day for 10 days, tapered in 4 weeks                      | 1 month            | Symptomatic relief after a week. After a month, laboratory test results were as follows: ESR 9, TSH 3.75, FT4 13.2.      |
| (2)       | 5           | Sohrabpour et al. | High-grade fever, fatigue, palpitations, markedly painful, tender, and slightly enlarged thyroid gland | Bilateral hypoechoic areas | NR                                                 | Prednisolone 25 mg/day for 10 days, tapered in 4 weeks                      | 1 month            | Symptomatic relief after a week. After a month, laboratory test results were as follows: ESR 25, TSH 1.84, FT4 18.9.     |
| (2)       | 6           | Sohrabpour et al. | High-grade fever, fatigue, palpitations, markedly painful, tender, and slightly enlarged thyroid gland | Bilateral hypoechoic areas | NR                                                 | Prednisolone 25 mg/day for 10 days, tapered in 4 weeks                      | 1 month            | Symptomatic relief after a week. After a month, laboratory test results were as follows: ESR 28, TSH 0.46, FT4 20.2.     |

|     |       |                    |                                                                                                                   |                                                                                                                                             |                       |                                                                                                                                                              |                  |                                                                                                                                                                          |
|-----|-------|--------------------|-------------------------------------------------------------------------------------------------------------------|---------------------------------------------------------------------------------------------------------------------------------------------|-----------------------|--------------------------------------------------------------------------------------------------------------------------------------------------------------|------------------|--------------------------------------------------------------------------------------------------------------------------------------------------------------------------|
| (2) | 7     | Sohrabpour et al.  | High-grade fever, fatigue, palpitations, markedly painful, tender, and slightly enlarged thyroid gland            | Bilateral hypoechoic areas                                                                                                                  | NR                    | Prednisolone 25 mg/day for 10 days, tapered in 4 weeks                                                                                                       | 1 month          | Symptomatic relief after a week. After a month, laboratory test results were as follows: ESR 2, TSH 3.67, FT4 12.7.                                                      |
| (3) | 8     | Osorio et al.      | Slight distal tremor with evident generalized diaphoresis and impalpable thyroid gland                            | Diffusely enlarged micro-nodular thyroid gland                                                                                              | 3 weeks               | Atenolol 50 mg twice daily and prednisone 50 mg daily with tapering in 2 weeks                                                                               | NR               | Symptomatic relief after three days. After detecting a primary hypothyroidism in the follow-up, levothyroxine 100 µg/day was started (the timing and final outcome: NR). |
| (4) | 9     | Ippolito et al.    | Palpitations, insomnia, and agitation                                                                             | Enlarged hypoechoic thyroid, decreased vascularity and a known 30-mm homogeneous nodule in the right lobe (with peripheral vascularization) | 5 days                | Methylprednisolone 40 mg intravenous for 3 days, then continuing with 25 mg/day oral prednisone, tapered in 4 weeks or more, according to clinical response. | 10 days          | Ten days after starting steroids, FT4 was 21.9 pg/ml and FT3 was 3.07 pg/ml.                                                                                             |
| (5) | 10    | Ünüböl et al.      | Severe pain, tenderness, and swelling of thyroid radiating to the right ear, fatigue, and myalgia                 | Hypoechoic, hypovascular areas of the right lobe, focally heterogeneous left lobe                                                           | 4 weeks               | Oral naproxen 550 mg twice a day for four weeks                                                                                                              | 4 weeks          | Pain and full symptomatic relief within two and ten days, respectively. TFT and inflammatory markers were normal after four weeks of treatment.                          |
| (5) | 11    | Ünüböl et al.      | Anterior neck pain, myalgia, fatigue, back pain, headache, and a tender and large thyroid gland                   | Bilateral and diffuse hypoechoic and hypovascular areas                                                                                     | 5 weeks               | Oral naproxen 550 mg twice a day for four weeks                                                                                                              | 4 weeks          | Pain relief in two days. TFT and inflammatory markers were normal after four weeks of treatment, although ESR was still elevated after four weeks (=23).                 |
| (6) | 12    | Ayhan and Guner    | Sinus tachycardia, pain, swelling, and tenderness in the anterior neck, fatigue, myalgia, palpitation, and tremor | Compatible with subacute thyroiditis (no findings were described)                                                                           | 2 weeks               | Prednisolone 16 mg/day with taper after one week, ibuprofen 1200 mg/day, and propranolol 20 mg three times a day                                             | 5 weeks          | Complete recovery in five weeks                                                                                                                                          |
| (7) | 13-30 | Brancatella et al. | Bilateral neck pain in 16 (89%) and Fever in 17 (94%)                                                             | Thyroid volume (IQR): 22 (5)                                                                                                                | Median (IQR): 29 (12) | Steroids in 16, NSAID in 1, and None in 1. Median duration (days) of steroid treatment was 85 (IQR=13).                                                      | Median: 3 months | Hypothyroidism in 13 of 15 patients (%87) with a follow-up of 3 months. Nine of these patients were checked at 6 months and were all still hypothyroid.                  |

## Supplementary Material

|      |    |                                  |                                                                                                                                                                                      |                                                                                |               |                                                                                                  |          |                                                                                                                                        |
|------|----|----------------------------------|--------------------------------------------------------------------------------------------------------------------------------------------------------------------------------------|--------------------------------------------------------------------------------|---------------|--------------------------------------------------------------------------------------------------|----------|----------------------------------------------------------------------------------------------------------------------------------------|
| (8)  | 31 | de la Higuera Lopez-Frias et al. | Anterior neck tenderness and pain radiating to the jaw, mild fever, palpitations, and fatigue                                                                                        | Compatible with subacute thyroiditis (no findings were described)              | About 45 days | Ibuprofen 600 mg/day and propranolol 10 mg/day                                                   | 5 months | Symptomatic relief and decrease of inflammatory markers after 15 days, normalization of TFT and inflammatory markers after five months |
| (9)  | 32 | Khatri et al.                    | Anterior neck pain radiating to the jaw, odynophagia, fever, chills, diaphoresis, weight loss, fatigue, alopecia, heat intolerance, irritability, headache, tremor, and palpitations | Heterogeneous thyroid gland with bilateral patchy ill-defined hypoechoic areas | 4 weeks       | Ibuprofen 600 mg/6 h and prednisone 40 mg/day, with a 4-week corticosteroid taper                | 45 days  | Symptomatic relief after 2 days                                                                                                        |
| (10) | 33 | Ruano et al.                     | Fever, neck pain radiating to the jaw, sore throat, palpitations, severe asthenia, sinus tachycardia, and a grade 2 goiter                                                           | NR                                                                             | About 1 month | Paracetamol 1 g/8 h for 10 days, then 500 mg of aspirin and 40 mg of propranolol, both every 6 h | 2 weeks  | Symptomatic relief in 24 hours after the initiation of aspirin, with a complete recovery in 2 weeks                                    |
| (11) | 34 | Baykan and Carlioglu             | Fatigue and neck pain radiating to the right jaw and ear                                                                                                                             | Widely enlarged and hypoechoic thyroid gland                                   | 18 days       | NSAID for ten days, then oral prednisolone 40 mg/day with gradual tapering of the dose           | 6 weeks  | Rapid clinical relief after corticosteroid therapy and normal TFT after six weeks                                                      |
| (11) | 35 | Baykan and Carlioglu             | Palpitations, tachycardia, sweating, and neck pain                                                                                                                                   | Diffuse hypoechoic areas                                                       | 22 days       | NSAID and oral prednisolone treatment for 4 weeks                                                | 4 weeks  | Clinical and TFT normalization after four weeks of corticosteroid therapy                                                              |
| (11) | 36 | Baykan and Carlioglu             | Palpitations, fever, fatigue, and neck pain spreading to the right jaw                                                                                                               | Widely enlarged and hypoechoic thyroid gland                                   | 25 days       | NSAID for a week, then oral prednisolone 40 mg/day for 5 weeks with tapering                     | 5 weeks  | Rapid clinical relief after corticosteroid therapy and normal TFT after five weeks                                                     |
| (11) | 37 | Baykan and Carlioglu             | Fatigue and anterior neck pain                                                                                                                                                       | Multiple hypoechoic areas                                                      | 20 days       | NSAID, then oral steroid treatment for 5 weeks                                                   | 5 weeks  | Clinical and TFT normalization after five weeks of corticosteroid therapy                                                              |
| (11) | 38 | Baykan and Carlioglu             | Tachycardia, mild fever, and neck pain                                                                                                                                               | Widely enlarged and hypoechoic thyroid gland                                   | 24 days       | NSAID then steroids                                                                              | NR       | Symptomatic relief after corticosteroid therapy                                                                                        |
| (12) | 39 | Abreu et al.                     | Mild pain in the anterior cervical region and a mild fever                                                                                                                           | Hypoechoic area in the right thyroid lobe                                      | 28 days       | Prednisone 15 mg/day                                                                             | 4 days   | Symptomatic relief within four days                                                                                                    |



|      |    |                       |                                                                                                                                                         |                                                                                                                         |                |                                                                                    |                |                                                                                                                                                                   |
|------|----|-----------------------|---------------------------------------------------------------------------------------------------------------------------------------------------------|-------------------------------------------------------------------------------------------------------------------------|----------------|------------------------------------------------------------------------------------|----------------|-------------------------------------------------------------------------------------------------------------------------------------------------------------------|
| (12) | 40 | Abreu et al.          | Asymptomatic                                                                                                                                            | Hypoechoic area in the right thyroid lobe, 10 days after diagnosis                                                      | 10 days        | Prednisone                                                                         | 18 days        | TFT normalization within 18 days                                                                                                                                  |
| (12) | 41 | Abreu et al.          | Pain in the anterior cervical region                                                                                                                    | A solid hypoechoic nodule in the left thyroid lobe                                                                      | 26 days        | NR                                                                                 | 2 weeks        | Normal ultrasound after two weeks                                                                                                                                 |
| (13) | 42 | Mathews et al.        | Weight loss, fatigue, and diarrhea                                                                                                                      | Mildly enlarged thyroid gland and 5-mm bilateral cysts                                                                  | Simultaneously | Methimazole 20 mg/day, then prednisone with tapering                               | About a year   | Free T4 was 1.36 ng/dL and TSH was 0.007 uIU/mL within a week. TFT was normal at the last follow-up.                                                              |
| (14) | 43 | Brancatella et al.    | Fever, neck pain radiating to the jaw, and palpitations                                                                                                 | Bilateral and diffuse hypoechoic areas                                                                                  | 15 days        | Prednisone 25 mg/day                                                               | 6 weeks        | Neck pain and fever resolved after 2 days and the remaining symptoms within 1 week. TFT and CRP were normal at the last follow-up, and ESR was slightly elevated. |
| (15) | 44 | Chakraborty et al.    | Neck pain, high grade fever, tachycardia, increased frequency of stools, and diffuse thyroid enlargement                                                | Diffuse bilateral thyroid enlargement with hypoechoogenicity, increased vascularity, and a solitary nodule in each lobe | Simultaneously | Propranolol 40 mg/day and oral prednisolone 30 mg/day with tapering over one month | 1 month        | Hypothyroidism after a month that was managed with oral levothyroxine (50 µg/day) with periodic monitoring of TFT.                                                |
| (16) | 45 | Campos-Barrera et al. | Fatigue and neck pain irradiating to the right jaw and ear                                                                                              | NR                                                                                                                      | 1 month        | NR                                                                                 | 1 month        | Clinical relief after a month, in spite of altered ESR and TSH (0.01 mUI/L)                                                                                       |
| (17) | 46 | Mattar et al.         | Diffuse thyromegaly, anterior neck pain refractory to symptomatic treatment, and a new-onset tachycardia                                                | Thyromegaly, bilateral hypoechoic areas with ill-defined margins, and bilateral hypovascularity                         | 9 days         | Prednisolone 20 mg/day and Atenolol 25 mg/day                                      | 10 weeks       | Symptomatic relief after two days and significant decrease in CRP after five days                                                                                 |
| (18) | 47 | Timofeeva et al.      | Feeling of suffocation, weakness, pain and pressure in the right side of neck radiating to the right ear, tremor, poor health, fatigue, and tachycardia | Bilateral hypoechoic areas with ill-defined margins and hypovascularity                                                 | About 1 month  | Prednisolone 30 mg/day, then Euthyrox 50 µg/day                                    | About 2 months | Clinical relief in 10 days, neck discomfort and tenderness in the last follow-up                                                                                  |

Supplementary Material

|      |    |                       |                                                                                                                                 |                                                                                                       |                |                                                                              |           |                                                                                      |
|------|----|-----------------------|---------------------------------------------------------------------------------------------------------------------------------|-------------------------------------------------------------------------------------------------------|----------------|------------------------------------------------------------------------------|-----------|--------------------------------------------------------------------------------------|
| (19) | 48 | Guven                 | Sore throat, odynophagia, fever, and painful, tender, and swollen neck                                                          | Heterogeneous, patchy infiltrations and bilateral hypoechoic areas                                    | About 20 days  | Methylprednisolone 32 mg                                                     | 2 months  | Clinical and TFT normalization after one week                                        |
| (20) | 49 | Chong et al.          | Anterior neck pain and tenderness, fatigue, chills, palpitations, postural tremors, heat intolerance, anorexia, and weight loss | Diffuse hypoechoic thyroid                                                                            | About 1 month  | Oral aspirin and propranolol for a week                                      | 70 days   | Hypothyroidism after three weeks that was managed with levothyroxine (1.6 µg/kg/day) |
| (21) | 50 | Semikov et al.        | Weakness, myalgia, palpitations, sweating, tachycardia, and swelling and pain in the anterior surface of the neck               | Diffuse thyromegaly, bilateral multiple hypoechoic areas, and right lobe pseudo-nodule                | 34 days        | Prednisone 30 mg/day for 4 weeks with a reduction of 5 mg per week           | 4 weeks   | Symptomatic relief within a week                                                     |
| (21) | 51 | Semikov et al.        | Neck pain, palpitations, fever, and tachycardia                                                                                 | Normal                                                                                                | 30 days        | Prednisone 30 mg/day with a reduction of 5 mg per week                       | 30 days   | Symptomatic relief within a week                                                     |
| (22) | 52 | Kong and La Porteb    | Painful and tender goiter, weight loss, malaise, and heat intolerance.                                                          | Hypoechoic and hypovascular areas                                                                     | 2 weeks        | Propranolol 40 mg/day, paracetamol, and ibuprofen                            | 12 weeks  | Symptomatic relief and TFT normalization in six and 12 weeks, respectively.          |
| (23) | 53 | Tjønnfjord et al.     | Fever, dysphagia, cough, headache, and myalgia                                                                                  | Slight diffuse thyromegaly with discrete surrounding edema and heterogeneous parenchyma and hyperemia | 3 weeks        | Prednisolone 20 mg/day with tapering over one month                          | 2 months  | Symptomatic relief within two days                                                   |
| (24) | 54 | Álvarez Martín et al. | Low-grade fever, malaise, insomnia, neck pain, and grade 1 goiter                                                               | Enlarged, heterogeneous thyroid gland with normal vascularization and a left thyroid nodule           | NR             | NSAID then prednisone 40 mg/day with tapering over 6 weeks                   | 3 months  | TFT normalized at 3 months.                                                          |
| (25) | 55 | Davoodi et al.        | Fever, chills, sweating, sore throat, dry cough, and slight tenderness in the thyroid area                                      | Heterogeneous thyroid gland with bilateral ill-defined hypoechoic areas                               | 8 days         | Dexamethasone 4 mg/8 h for 5 days, then oral prednisone 25 mg/day with taper | 45 days   | TFT normalization at the last follow-up                                              |
| (26) | 56 | Stasiak et al.        | Palpable hard neck, fever, and headaches                                                                                        | hypoechoic areas in the right thyroid lobe                                                            | Simultaneously | Prednisone                                                                   | 10 months | Rapid improvement of symptoms and gradual normalization of inflammatory parameters   |

|      |    |                    |                                                                                                                               |                                                           |                |                                                        |          |                                                                                                                                                                      |
|------|----|--------------------|-------------------------------------------------------------------------------------------------------------------------------|-----------------------------------------------------------|----------------|--------------------------------------------------------|----------|----------------------------------------------------------------------------------------------------------------------------------------------------------------------|
| (26) | 57 | Stasiak et al.     | NR                                                                                                                            | hypoechoic areas in the right thyroid lobe                | 4 weeks        | Prednisone (starting dose 60 mg/day)                   | 8 months | Recurrence of symptoms occurred after attempts of tapering of prednisolone. Prednisolone withdrawal was achieved within four months from the start of the treatment. |
| (26) | 58 | Stasiak et al.     | Neck pain and fever                                                                                                           | Bilateral hypoechoic areas                                | 5 weeks        | Prednisone                                             | NR       | Symptoms resolved after the completion of prednisone therapy and recurred a week after that. Thus, a re-treatment with prednisone was initiated.                     |
| (26) | 59 | Stasiak et al.     | Neck pain radiating to the ear, fever, tachycardia, and mood changes                                                          | Bilateral hypoechoic areas                                | 4 months       | Prednisone 40 mg/day                                   | NR       | Complete recovery at the end of the treatment with prednisone                                                                                                        |
| (27) | 60 | Brancatella et al. | Neck pain, fever, palpitations, asthenia, and anorexia                                                                        | Thyromegaly, hypoechoic areas, and absent vascularization | 16 days        | Prednisone 25 mg/day                                   | 6 weeks  | TFT normalization within six weeks                                                                                                                                   |
| (27) | 61 | Brancatella et al. | Neck pain, fever, palpitations, asthenia, and sweating                                                                        | hypoechoic areas and reduced vascularization              | 30 days        | Prednisone 25 mg/day with taper, propranolol 40 mg/day | 6 weeks  | Neck pain and fever disappeared within three days and the other symptoms within two weeks. Subclinical hypothyroidism occurred after 6 weeks.                        |
| (27) | 62 | Brancatella et al. | Severe neck pain radiating to the jaw, fever, palpitations, and anxiety                                                       | Thyromegaly and hypoechoic areas                          | 20 days        | Prednisone 25 mg/day                                   | 6 weeks  | Symptomatic relief within two weeks. TFT was normal at the last follow-up while taking 20 mg/d prednisone.                                                           |
| (28) | 63 | Sato et al.        | Fever, anterior neck pain radiating to the jaw, enlargement of the left lobe of thyroid with pain spreading to the right lobe | Hypoechoic areas                                          | 23 days        | Prednisolone 15 mg/day (tapered over 7 weeks)          | 7 weeks  | The neck pain and fever resolved the next day, and the other symptoms improved within a week. TFT and Inflammatory markers normalized within seven weeks.            |
| (29) | 64 | San Juan et al.    | Neck pain radiating to submandibular region                                                                                   | Enlarged right lobe with ill-defined hypoechoic areas     | Simultaneously | Celecoxib                                              | 8 weeks  | Symptomatic relief after a month and then overt hypothyroidism after eight weeks that was managed with levothyroxine                                                 |

Supplementary Material

|      |    |                         |                                                                                   |                                                                         |         |                                                                                                                                                                                                         |          |                                                                                                          |
|------|----|-------------------------|-----------------------------------------------------------------------------------|-------------------------------------------------------------------------|---------|---------------------------------------------------------------------------------------------------------------------------------------------------------------------------------------------------------|----------|----------------------------------------------------------------------------------------------------------|
| (30) | 65 | Ruggeri et al.          | Pain and tenderness in the anterior neck, fatigue, tremor, and palpitations       | Thyromegaly and hypoechoic areas                                        | 6 weeks | Prednisone 25 mg/day with taper                                                                                                                                                                         | 4 weeks  | Normalization of inflammatory indices and TFT within 2 and 4 weeks, respectively.                        |
| (31) | 66 | Mehmood et al.          | Odynophagia, dysphagia, intermittent fever, tachycardia, dyspnea, and weight loss | Thyromegaly                                                             | 7 weeks | Prednisone 20 mg/day and atenolol 25 mg/day, which were increased to 40 and 50 mg daily, respectively, after three days. After a six week taper period of prednisolone, Atenolol was also discontinued. | 10 weeks | clinical recovery and TFT normalization after 10 weeks of follow up                                      |
| (32) | 67 | Seyed Resuli and Bezgal | Neck pain, odynophagia, palpitations, warm sensation                              | Bilateral hypoechoic areas                                              | NR      | Aspirin (approximately 3 g/d) for 5 days                                                                                                                                                                | 10 weeks | Laboratory results returned to normal 15 days after starting aspirin treatment and symptoms disappeared. |
| (32) | 68 | Seyed Resuli and Bezgal | Neck pain radiating to the right ear, palpitations, and sweating                  | Diffuse hypoechoic growth and reduced vascularization in the right lobe | NR      | Aspirin (approximately 3 g/d) for 5 days                                                                                                                                                                | 10 weeks | Laboratory results returned to normal 25 days after starting aspirin treatment and symptoms disappeared. |
| (32) | 69 | Seyed Resuli and Bezgal | Neck pain radiating to the left ear, weakness, irritability, and fever            | Thyromegaly and hypoechoic areas                                        | NR      | Aspirin (approximately 3 g/d) for 5 days, prednisolone 1 mg/kg/day with tapering over 10 days                                                                                                           | 10 weeks | Laboratory results returned to normal on day 29 and symptoms disappeared.                                |
| (32) | 70 | Seyed Resuli and Bezgal | Neck pain radiating to both ears, irritability, and palpitations                  | Hypoechoic thyroid                                                      | NR      | Aspirin (approximately 3 g/d) for 5 days                                                                                                                                                                | 10 weeks | Laboratory results returned to normal 22 days after starting aspirin treatment and symptoms disappeared. |
| (32) | 71 | Seyed Resuli and Bezgal | Neck pain, irritability, weight loss, warm sensation, fever, and sweating         | Thyromegaly and hypoechoic areas in the left lobe                       | NR      | Aspirin (approximately 3 g/d) for 5 days, prednisolone 1 mg/kg/day with tapering over 10 days                                                                                                           | 10 weeks | Laboratory results returned to normal on day 34 and symptoms disappeared.                                |
| (33) | 72 | Bahçecioğlu et al.      | Neck pain, asthenia, sweating, and palpitations                                   | Bilateral involvement                                                   | 78 days | Methylprednisolone 24 mg/day for 6 weeks                                                                                                                                                                | NR       | NR                                                                                                       |

|      |    |                    |                                                 |                        |                |                                                                                                                                                                                                                                                           |    |    |
|------|----|--------------------|-------------------------------------------------|------------------------|----------------|-----------------------------------------------------------------------------------------------------------------------------------------------------------------------------------------------------------------------------------------------------------|----|----|
| (33) | 73 | Bahçecioğlu et al. | Neck pain and asthenia                          | Unilateral involvement | 21 days        | Methylprednisolone 24 mg/day for five weeks, after refraction to the initial two-week treatment with NSAIDs                                                                                                                                               | NR | NR |
| (33) | 74 | Bahçecioğlu et al. | Neck pain, asthenia, sweating, and palpitations | Bilateral involvement  | 49 days        | Methylprednisolone 16 mg/day for four weeks, after refraction to the initial one-week treatment with NSAIDs                                                                                                                                               | NR | NR |
| (33) | 75 | Bahçecioğlu et al. | Neck pain                                       | Bilateral involvement  | 168 days       | NSAIDs for 4 weeks                                                                                                                                                                                                                                        | NR | NR |
| (33) | 76 | Bahçecioğlu et al. | Neck pain and sweating                          | Bilateral involvement  | 168 days       | Methylprednisolone 32 mg for seven weeks, after refraction to the initial one-week treatment with NSAIDs                                                                                                                                                  | NR | NR |
| (33) | 77 | Bahçecioğlu et al. | Neck pain and weight loss                       | Unilateral involvement | NR             | None                                                                                                                                                                                                                                                      | NR | NR |
| (33) | 78 | Bahçecioğlu et al. | Neck pain, asthenia, and fever                  | Bilateral involvement  | simultaneously | Methylprednisolone 32 mg/day for 6 weeks                                                                                                                                                                                                                  | NR | NR |
| (33) | 79 | Bahçecioğlu et al. | Neck pain, sweating, cough, and palpitations    | Bilateral involvement  | simultaneously | Methylprednisolone 16 mg/day for 4 weeks                                                                                                                                                                                                                  | NR | NR |
| (33) | 80 | Bahçecioğlu et al. | Neck pain, fever, cough, and dyspnea            | Bilateral involvement  | simultaneously | Methylprednisolone 32 mg/day, given in four treatment courses due to clinical relapse; in the fourth course, colchicine 1 mg/day was added when the patient was receiving 8mg of methylprednisolone in the tapering period and was continued for 9 weeks. | NR | NR |

Supplementary Material

|      |       |                         |                                                                                                 |                                                                                                         |                            |                                                                                                                                                                                                          |                      |                                                                                                                                                                                                                                                                                                                                    |
|------|-------|-------------------------|-------------------------------------------------------------------------------------------------|---------------------------------------------------------------------------------------------------------|----------------------------|----------------------------------------------------------------------------------------------------------------------------------------------------------------------------------------------------------|----------------------|------------------------------------------------------------------------------------------------------------------------------------------------------------------------------------------------------------------------------------------------------------------------------------------------------------------------------------|
| (34) | 81    | Elawady et al.          | Swollen and painful neck, fever, malaise, and myalgia                                           | Thyromegaly and hypoechoic areas in the isthmus                                                         | 2 weeks                    | Oral prednisone 40 mg/day and ibuprofen 800 mg/day for several weeks                                                                                                                                     | 2 weeks              | Recovery within two weeks                                                                                                                                                                                                                                                                                                          |
| (35) | 82    | Jakovac et al.          | NR                                                                                              | NR                                                                                                      | NR                         | NR                                                                                                                                                                                                       | 4 hours              | Death due to acute respiratory distress syndrome within four hours after admission                                                                                                                                                                                                                                                 |
| (36) | 83    | Salehi et al.           | Diffuse neck pain radiating to the jaw and hot flashes                                          | Thyromegaly and hypoechoic areas                                                                        | 15 days                    | Aspirin, then prednisolone 25 mg/day due to unresponsiveness to aspirin                                                                                                                                  | 1 month              | Full recovery in three weeks                                                                                                                                                                                                                                                                                                       |
| (37) | 84    | Hajósi-Kalcakosz et al. | Neck pain and tenderness radiating to the jaw, fever, fatigue, myalgia, palpitation, and tremor | Diffuse hypoechoic left lobe and a small hypoechoic area in the right lobe with slurred borders         | 5 weeks                    | Methylprednisolone 32 mg/day for 2 weeks (tapered over 6 weeks), unresponsive to initial NSAID treatment                                                                                                 | 2 months             | Symptomatic recovery within two weeks                                                                                                                                                                                                                                                                                              |
| (38) | 85    | Ashraf et al.           | Fever, fatigue, delirium, staring, weight loss, thyroid tenderness, tachypnea, and odynophagia  | NR                                                                                                      | 6 days                     | Intravenous dexamethasone 4 mg twice daily for 3 days, then oral prednisolone 15 mg twice daily for 1 week (tapered over 17 days) and naproxen                                                           | 3 weeks              | Symptomatic relief and TFT normalization within four days and three weeks, respectively.                                                                                                                                                                                                                                           |
| (39) | 86-96 | Mondal et al.           | Palpitations, tremor, diarrhea, fever, congestive heart failure, and neck pain and tenderness   | Diffuse thyromegaly (n=7, 63.6%), hypoechoic areas (n=11, 100%) and/or reduced vascularity (n=4, 36.4%) | Mean: 23.8 days (SD: 14.8) | Prednisolone 1 mg/kg/day for 10 days for four patients, with tapering over a mean duration of 4.5 weeks; oral levothyroxine (1.6 µg/kg daily) for a patient with overt hypothyroidism after three months | 6 months             | Glucocorticoids did not change the outcome. At 3 months, four patients were hypothyroid (three subclinical, one overt). Two were euthyroid at 6 months, while the two other had subclinical and overt hypothyroidism. The latter two patients were both treated with oral glucocorticoids and were positive for Anti-TPO antibody. |
| (40) | 97    | Kleim et al.            | Fever for three weeks                                                                           | Right lobe enlargement with blurred borders and hypoechoic areas                                        | NR                         | Prednisolone 50 mg/day for seven days with tapering over 10 weeks                                                                                                                                        | 5 months and 2 weeks | Immediate clinical improvement; ultrasonography and TFT normalized within five days.                                                                                                                                                                                                                                               |

|      |     |                          |                                                                                                                                                                                                     |    |                |                                      |          |                                   |
|------|-----|--------------------------|-----------------------------------------------------------------------------------------------------------------------------------------------------------------------------------------------------|----|----------------|--------------------------------------|----------|-----------------------------------|
| (41) | 98  | Al-Shammaa and Abdlkadir | Palpitations, sweating, agitation, neck pain, tremor, and tachycardia                                                                                                                               | NR | 10 days        | Beta-blockers and low dose analgesia | 3 months | Full recovery within 3 months     |
| (42) | 99  | Dolkar et al.            | Abdominal pain and tachycardia                                                                                                                                                                      | NR | Simultaneously | Dexamethasone                        | NR       | NR                                |
| (43) | 100 | Poudel Jaishi et al.     | Sweating, fatigue, sore throat, dysphagia, diarrhea, insomnia, anorexia, tachycardia, neck pain, and agitation (the symptoms cannot be distinguished from COVID-19 symptoms because they coincided) | NR | Simultaneously | Steroids for 15 days                 | 15 days  | Symptomatic relief within 15 days |

NR: not reported; SD: standard deviation; IQR: interquartile range; n: number; h: hour(s); TFT: thyroid function test; FT4: free T4; FT3: free T3; TSH: thyroid stimulating hormone; Anti-TPO: thyroid peroxidase antibody; NSAID: non-steroidal anti-inflammatory drug; ESR: erythrocyte sedimentation rate; IU: international unit.

**Supplementary Table 4. Biochemical results of the patients**

| Reference | Case Number | Author                           | TSH (mIU/L) | Free T4      | Normal Free T4 range | Free T3            | Normal Free T3 range  | ESR (mm/hr) | CRP (mg/L) | Tg        | Anti-Tg (IU/ml) | Anti-TPO (IU/ml) | TSI       | TRAb (IU/ml) |
|-----------|-------------|----------------------------------|-------------|--------------|----------------------|--------------------|-----------------------|-------------|------------|-----------|-----------------|------------------|-----------|--------------|
| (1)       | 1           | Feghali et al.                   | 0.01        | 1.9 ng/dl    | 0.8-1.8 ng/dl        | NR                 | NR                    | NR          | NR         | 2.4 ng/mL | 3               | 69               | 89%       | 1 IU/L       |
| (2)       | 2           | Sohrabpour et al.                | 0.07        | 19.5 pmol/L  | 12-21 pmol/L         | 18.9 pmol/L        | 3.1-6.8 pmol/L        | 25          | 70         | NR        | NR              | NR               | NR        | NR           |
| (2)       | 3           | Sohrabpour et al.                | 0.01        | 22.3 pmol/L  | 12-21 pmol/L         | 25.4 pmol/L        | 3.1-6.8 pmol/L        | 38          | 56         | NR        | NR              | NR               | NR        | NR           |
| (2)       | 4           | Sohrabpour et al.                | 0.12        | 24.7 pmol/L  | 12-21 pmol/L         | 19.3 pmol/L        | 3.1-6.8 pmol/L        | 18          | 45         | NR        | NR              | NR               | NR        | NR           |
| (2)       | 5           | Sohrabpour et al.                | 0.01        | 21.9 pmol/L  | 12-21 pmol/L         | 23.7 pmol/L        | 3.1-6.8 pmol/L        | 43          | 83         | NR        | NR              | NR               | NR        | NR           |
| (2)       | 6           | Sohrabpour et al.                | 0.17        | 26.7 pmol/L  | 12-21 pmol/L         | 21.6 pmol/L        | 3.1-6.8 pmol/L        | 51          | 76         | NR        | NR              | NR               | NR        | NR           |
| (2)       | 7           | Sohrabpour et al.                | 0.23        | 18.4 pmol/L  | 12-21 pmol/L         | 18.1 pmol/L        | 3.1-6.8 pmol/L        | 23          | 39         | NR        | NR              | NR               | NR        | NR           |
| (3)       | 8           | Osorio et al.                    | 0.01        | 1.85 ng/dL   | 0.7-1.48 ng/dl       | TF3<br>643.4 ng/dl | TF3<br>35-193 ng/dl   | NR          | NR         | NR        | 17              | 15               | NA        | 0.56         |
| (4)       | 9           | Ippolito et al.                  | 0.08        | 24.6 pg/ml   | 0.3-17 pg/ml         | 5.5 pg/ml          | 2-4.4 pg/ml           | NR          | NR         | 187 µg/L  | Negative        | Negative         | NR        | Negative     |
| (5)       | 10          | Ünüböl et al.                    | 0.139       | 1.39 ng/dl   | 0.7-1.4 ng/dl        | NR                 | NR                    | 78          | 45         | NR        | Negative        | Negative         | NR        | NR           |
| (5)       | 11          | Ünüböl et al.                    | 0.99        | 1.02 ng/dl   | 0.7-1.4 ng/dl        | NR                 | NR                    | 68          | 18.4       | NR        | Negative        | Negative         | NR        | NR           |
| (6)       | 12          | Ayhan and Guner                  | 0.01        | 3.72 ng/dl   | 0.89-1.76 ng/dl      | 11 ng/L            | 2.3-4.2 ng/L          | 79          | 74.9       | NR        | <1.3            | NR               | NR        | Negative     |
| (7)       | 13-30       | Brancatella et al.               | 0.1         | 24.3 nmol/L  | 6-16 nmol/L          | 5.8 pmol/L         | 2.3-4.2 pmol/L        | 43          | 3.8        | 69 (IQR)  | 65 (IQR)        | 35 (IQR)         | NR        | NR           |
| (8)       | 31          | de la Higuera Lopez-Frias et al. | 0.008       | 27.93 pmol/L | 12-22 pmol/L         | FT3<br>2.57        | FT3<br>1.3-3.1 nmol/L | 31          | 1.05       | NR        | 3.4             | 15.5             | NR        | <0.10 IU/L   |
| (9)       | 32          | Khatri et al.                    | 0.018       | NR           | NR                   | NR                 | NR                    | 107         | 36.4       | NR        | NR              | ↑96.71           | <0.1 IU/L | <1.10 IU/L   |
| (10)      | 33          | Ruano et al.                     | 0.001       | 37.5 pmol/L  | 7-16 pmol/L          | NR                 | NR                    | 116         | 176        | NR        | Negative        | Negative         | NR        | Negative     |



|      |    |                       |              |             |                 |                  |                     |     |      |          |          |          |           |          |
|------|----|-----------------------|--------------|-------------|-----------------|------------------|---------------------|-----|------|----------|----------|----------|-----------|----------|
| (11) | 34 | Baykan and Carlioglu  | 0.11         | 2.21        | 0.89-1.76 g/dL  | 4.19             | 2.3-4.2 pg/mL       | 52  | 36   | NR       | 27       | 14       | <0.1 IU/L | NR       |
| (11) | 35 | Baykan and Carlioglu  | 0.05         | 2.89        | 0.89-1.76 g/dL  | 4.79             | 2.3-4.2 pg/mL       | 72  | 48   | NR       | 48       | 2.53     | <0.1 IU/L | NR       |
| (11) | 36 | Baykan and Carlioglu  | 0.06         | 2.35        | 0.89-1.76 g/dL  | 4.28             | 2.3-4.2 pg/mL       | 42  | 12   | NR       | 18       | 18.6     | <0.1 IU/L | NR       |
| (11) | 37 | Baykan and Carlioglu  | 0.21         | 2.13        | 0.89-1.76 g/dL  | 4.48             | 2.3-4.2 pg/mL       | 27  | 13.9 | NR       | 21       | 7.5      | <0.1 IU/L | NR       |
| (11) | 38 | Baykan and Carlioglu  | 0.39         | 1.27        | 0.89-1.76 g/dL  | 3.45             | 2.3-4.2 pg/mL       | 50  | 46.7 | NR       | 11       | 28       | <0.1 IU/L | NR       |
| (12) | 39 | Abreu et al.          | NR           | NR          | NR              | NR               | NR                  | NR  | NR   | NR       | NR       | NR       | NR        | NR       |
| (12) | 40 | Abreu et al.          | NR           | 1.8 ng/dl   | NR              | NR               | NR                  | NR  | NR   | NR       | NR       | NR       | NR        | NR       |
| (12) | 41 | Abreu et al.          | NR           | NR          | NR              | NR               | NR                  | NR  | NR   | NR       | NR       | NR       | NR        | NR       |
| (13) | 42 | Mathews et al.        | 0.029        | 2.1 ng/dL   | 0.8-1.7 ng/dL   | NR               | NR                  | 37  | 53   | NR       | Normal   | Normal   | Normal    | Normal   |
| (14) | 43 | Brancatella et al.    | 0.04         | 27.2        | 11-23 nmol/L    | 8.7              | 4.6-8.4 pmol/L      | 90  | 6.9  | 5.6 µg/L | 120.2    | <10      | NR        | <1.5     |
| (15) | 44 | Chakraborty et al.    | 0.005        | 20.11 µg/dl | 5.1-14.1 µg/dl  | 2.88 ng/ml       | 0.8-2 ng/ml         | 110 | 16.6 | NR       | NR       | Negative | NR        | Negative |
| (16) | 45 | Campos-Barrera et al. | Undetectable | 1.6 ng/dl   | NR              | TF3<br>211 ng/dl | NR                  | 72  | 66   | Negative | Negative | NR       | NR        | NR       |
| (17) | 46 | Mattar et al.         | 0.01         | 41.8 pmol/L | 8.8-14.4 pmol/L | 13.4 pmol/L      | 3.2-5.3 pmol/L      | NR  | 122  | NR       | NR       | Negative | NR        | Negative |
| (18) | 47 | Timofeeva et al.      | 0.13         | 1.82 pg/dl  | 0.89-1.52 pg/dl | NR               | 2.43-3.98 pg/ml     | 24  | 3    | NR       | NR       | NR       | NR        | NR       |
| (19) | 48 | Guven                 | 0.005        | 3.61 ng/dL  | NR              | 4.24 pg/mL       | NR                  | 80  | 7.69 | NR       | Negative | Negative | NR        | Negative |
| (20) | 49 | Chong et al.          | 0.01         | 2.3 ng/dl   | 0.6-1.3 ng/dl   | FT3<br>202 ng/dl | FT3<br>80-150 ng/dl | 31  | 14   | NR       | NR       | 1 IU/l   | 0.1 IU/l  | NR       |
| (21) | 50 | Semikov et al.        | 0.005        | 3.2 ng/dl   | NR              | NR               | NR                  | 32  | NR   | NR       | NR       | 2        | NR        | NR       |
| (21) | 51 | Semikov et al.        | 0.0083       | 3.4 ng/dl   | NR              | NR               | NR                  | 47  | NR   | NR       | NR       | 1        | 0.73 IU/L | NR       |

Supplementary Material

|             |    |                        |        |             |                 |                 |                    |     |          |           |          |          |          |           |
|-------------|----|------------------------|--------|-------------|-----------------|-----------------|--------------------|-----|----------|-----------|----------|----------|----------|-----------|
| <b>(22)</b> | 52 | Kong and La Porteb     | 0.009  | 26.3 pmol/L | 7-16 pmol/L     | 7.4 pmol/L      | 3.8-6 pmol/L       | 104 | 171      | NR        | NR       | Positive | NR       | <0.3 IU/L |
| <b>(23)</b> | 53 | Tjønnfjord et al.      | 0.01   | 27.8 pmol/L | 9-19 pmol/L     | 7.5 pmol/L      | 2.6-5.7 pmol/L     | NA  | 86       | NR        | NR       | <3       | NR       | <0.9 IU/L |
| <b>(24)</b> | 54 | Álvarez Martín et al.  | 0.11   | 2.18 ng/dl  | NR              | NR              | NR                 | 68  | NR       | NR        | NR       | Positive | NR       | NR        |
| <b>(25)</b> | 55 | Davoodi et al.         | 0.001  | NR          | NR              | NR              | NR                 | 84  | 46       | NR        | NR       | Negative | NR       | Negative  |
| <b>(26)</b> | 56 | Stasiak et al.         | 1.53   | 0.96 ng/Dl  | 0.93-1.7 ng/dL  | 3.75 pg/ml      | 2-4.4 pg/ml        | 52  | 9        | NR        | 21.6     | 8.6      | NR       | 1.58 IU/L |
| <b>(26)</b> | 57 | Stasiak et al.         | 0.005  | 7.7 ng/Dl   | 0.93-1.7 ng/dL  | 21.6 pg/ml      | 2-4.4 pg/ml        | 59  | 60       | NR        | 13.3     | 10.2     | NR       | <0.8 IU/L |
| <b>(26)</b> | 58 | Stasiak et al.         | 0.01   | 2.39 ng/Dl  | 0.93-1.7 ng/dL  | 5.13 pg/ml      | 2-4.4 pg/ml        | 140 | 4.98     | NR        | 512      | 10.4     | NR       | 0.8 IU/L  |
| <b>(26)</b> | 59 | Stasiak et al.         | 0.07   | 2.34 ng/dL  | 0.93-1.7 ng/dL  | 5.24 pg/ml      | 2-4.4 pg/ml        | 117 | 4.71     | NR        | 25       | 9.4      | NR       | 0.94 IU/L |
| <b>(27)</b> | 60 | Brancatella et al.     | 0.1    | 29.3 nmol/L | NR              | 8 pmol/L        | NR                 | 74  | 11.2     | 75.3 µg/l | <30      | <10      | NR       | <1.5      |
| <b>(27)</b> | 61 | Brancatella et al.     | 0.01   | 31.8 nmol/L | NR              | 8.9 pmol/L      | NR                 | 110 | 7.9      | 80 µg/l   | 38       | <10      | NR       | <1.5      |
| <b>(27)</b> | 62 | Brancatella et al.     | 0.01   | 27.8 nmol/L | NR              | 6.9 pmol/L      | NR                 | NR  | 8        | NR        | NR       | NR       | NR       | <1.5      |
| <b>(28)</b> | 63 | Sato et al.            | <0.001 | 3.2 ng/dL   | 0.8-1.9 ng/dL   | 7.3 pg/ml       | 2.2-4.1pg/ml       | 93  | 3.6      | NR        | NR       | Negative | NR       | NR        |
| <b>(29)</b> | 64 | San Juan et al.        | 0.05   | 1.68 pg/ml  | 0.78-2.19 pg/ml | NR              | NR                 | NR  | Elevated | NR        | Negative | Negative | NR       | Negative  |
| <b>(30)</b> | 65 | Ruggeri et al.         | 0.006  | 2.69 ng/dl  | 0.7-1.48 ng/dl  | 7.03 pg/ml      | 1.71-3.71 pg/ml    | 60  | 8.8      | NR        | Negative | Negative | Negative | NR        |
| <b>(31)</b> | 66 | Mehmood et al.         | 0.01   | 4.4 ng/L    | 0.6-1.3 ng/L    | TF3<br>374 ng/L | TF3<br>80-150 ng/L | 84  | 44       | 188       | NR       | Negative | Negative | NR        |
| <b>(32)</b> | 67 | Seyed Resuli and Bezgl | Low    | 26.8 pmol/L | 12-22 pmol/L    | 8.4 pmol/L      | 3-6 pmol/L         | 65  | High     | NR        | NR       | Negative | Negative | NR        |
| <b>(32)</b> | 68 | Seyed Resuli and Bezgl | Low    | 28.1 pmol/L | 12-22 pmol/L    | 9.6 pmol/L      | 3-6 pmol/L         | 58  | High     | NR        | NR       | Negative | Negative | NR        |

|      |       |                           |       |              |                  |              |                  |      |        |    |          |          |          |           |
|------|-------|---------------------------|-------|--------------|------------------|--------------|------------------|------|--------|----|----------|----------|----------|-----------|
| (32) | 69    | Seyed Resuli and Bezgal   | Low   | 43.1 pmol/L  | 12-22 pmol/L     | 14.2 pmol/L  | 3-6 pmol/L       | 70   | High   | NR | NR       | Negative | Negative | NR        |
| (32) | 70    | Seyed Resuli and Bezgal   | Low   | 38.1 pmol/L  | 12-22 pmol/L     | 11.3 pmol/L  | 3-6 pmol/L       | 65   | High   | NR | NR       | Negative | Negative | NR        |
| (32) | 71    | Seyed Resuli and Bezgal   | Low   | 43.5 pmol/L  | 12-22 pmol/L     | 16.2 pmol/L  | 3-6 pmol/L       | 80   | High   | NR | NR       | Negative | Negative | NR        |
| (33) | 72-80 | Bahçecioglu et al.        | 0.015 | 27.9 pmol/L  | 7-15.96 pmol/L   | 8.1 pmol/L   | 3.99-6.71 pmol/L | 47.5 | 49.2   | NR | NR       | NR       | NR       | NR        |
| (34) | 81    | Elawady et al.            | 0.04  | Normal level | NR               | Normal level | NR               | NR   | NR     | NR | NR       | Negative | Negative | NR        |
| (35) | 82    | Jakovac et al.            | NR    | NR           | NR               | NR           | NR               | NR   | 59.6   | NR | NR       | NR       | NR       | NR        |
| (36) | 83    | Salehi et al.             | 0.29  | 15.8 ng/dl   | 5.1-14.1 ng/dl   | 190 ng/dl    | 40-181 ng/dl     | 121  | 92.6   | NR | NR       | NR       | NR       | NR        |
| (37) | 84    | Hajósi-Kalcakosz et al.   | 0.046 | 1.60 ng/dl   | 0.70-1.48 ng/dl  | 4.10 pg/ml   | 1.71-3.71 pg/ml  | 34   | 16.9   | NR | Negative | Negative | NR       | NR        |
| (38) | 85    | Ashraf et al.             | NR    | NR           | NR               | NR           | NR               | NR   | NR     | NR | NR       | NR       | NR       | NR        |
| (39) | 86    | Mondal et al.             | 0.001 | 1.59 ng/dl   | 0.61-1.72 ng/dl  | 4.5 pg/ml    | 2.2-4.2 pg/ml    | 67   | 99.9   | NR | NR       | Negative | NR       | Negative  |
| (39) | 87    | Mondal et al.             | 0.003 | 3.61 ng/dl   | 0.61-1.72 ng/dl  | 8.6 pg/ml    | 2.2-4.2 pg/ml    | 36   | 347.22 | NR | NR       | Negative | NR       | Negative  |
| (39) | 88    | Mondal et al.             | 0.001 | 2.99 ng/dl   | 0.61-1.72 ng/dl  | 0.73 pg/ml   | 2.2-4.2 pg/ml    | 85   | 219.58 | NR | NR       | Negative | NR       | Negative  |
| (39) | 89    | Mondal et al.             | 0.005 | 2.33 ng/dl   | 0.61-1.72 ng/dl  | 6.2 pg/ml    | 2.2-4.2 pg/ml    | 94   | 109.93 | NR | NR       | Negative | NR       | Negative  |
| (39) | 90    | Mondal et al.             | 0.001 | 2.2 ng/dl    | 0.61-1.72 ng/dl  | 6.5 pg/ml    | 2.2-4.2 pg/ml    | 51   | 284.95 | NR | NR       | Negative | NR       | Negative  |
| (39) | 91    | Mondal et al.             | 0.003 | 2.2 ng/dl    | 0.61-1.72 ng/dl  | 5.9 pg/ml    | 2.2-4.2 pg/ml    | 82   | 69.24  | NR | NR       | Negative | NR       | Negative  |
| (39) | 92    | Mondal et al.             | 0.001 | 2.45 ng/dl   | 0.61-1.72 ng/dl  | 5.1 pg/ml    | 2.2-4.2 pg/ml    | 80   | 74.5   | NR | NR       | Negative | NR       | Negative  |
| (39) | 93    | Mondal et al.             | 0.02  | 1.81 ng/dl   | 0.61-1.72 ng/dl  | 4.1 pg/ml    | 2.2-4.2 pg/ml    | 76   | 6.1    | NR | NR       | Negative | NR       | Negative  |
| (39) | 94    | Mondal et al.             | 0.001 | 2.1 ng/dl    | 0.61-1.72 ng/dl  | 4.8 pg/ml    | 2.2-4.2 pg/ml    | 73   | 154.49 | NR | NR       | Negative | NR       | Negative  |
| (39) | 95    | Mondal et al.             | 0.001 | 1.72 ng/dl   | 0.61-1.72 ng/dl  | 4.9 pg/ml    | 2.2-4.2 pg/ml    | 40   | 10.51  | NR | NR       | Negative | NR       | Negative  |
| (39) | 96    | Mondal et al.             | 0.03  | 1.87 ng/dl   | 0.61-1.72 ng/dl  | 5.5 pg/ml    | 2.2-4.2 pg/ml    | 85   | 99.9   | NR | NR       | Negative | NR       | Negative  |
| (40) | 97    | Kleim et al.              | 0.01  | 27.48 pmol/l | 0.2-4.0 pmol/l   | 11.77 pmol/l | 3.2-7.2 pmol/l   | NR   | 193.9  | NR | Normal   | Normal   | NR       | NR        |
| (41) | 98    | Al-Shammaa and Abdilkadir | 0.021 | 31.6 pmol/L  | 10.3–22.7 pmol/L | 13.8 pmol/L  | 2.76–11.5 pmol/L | NR   | NR     | NR | 26.8     | 13.7     | NR       | 1.24 IU/L |

|      |     |                      |           |            |                 |           |               |    |    |    |      |    |            |    |
|------|-----|----------------------|-----------|------------|-----------------|-----------|---------------|----|----|----|------|----|------------|----|
| (42) | 99  | Dolkar et al.        | 0.074     | 2.51 ng/dL | 0.78-2.19 ng/dL | NR        | NR            | NR | NR | NR | <1.0 | 10 | <0.10 IU/L | NR |
| (43) | 100 | Poudel Jaishi et al. | 2.4 pg/ml | 21 pg/ml   | 8-17.2 pg/ml    | 3.4 pg/ml | 2.4-4.2 pg/ml | 46 | 60 | NR | NR   | NR | NR         | NR |

NR: not reported; TSH: Thyroid stimulating hormone; ESR: Erythrocyte sedimentation rate; CRP: C-reactive protein; Tg: Thyroglobulin; anti-Tg: Thyroglobulin antibody; anti-TPO: Thyroid peroxidase antibody; TSI: Thyroid-stimulating immunoglobulin; TRAb: Thyrotropin receptor antibody

## References:

1. Feghali K, Atallah J, Norman C. Manifestations of thyroid disease post COVID-19 illness: Report of Hashimoto thyroiditis, Graves' disease, and subacute thyroiditis. *J Clin Transl Endocrinol Case Rep.* 2021;22:100094.
2. Sohrabpour S, Heidari F, Karimi E, Ansari R, Tajdini A, Heidari F. Subacute Thyroiditis in COVID-19 Patients. *Eur Thyroid J.* 2021;9(6):321-3.
3. Osorio Martínez A, González-Razo VT, Navarro-Sánchez V, Souto Meiriño CA, Ahumada-Ayala M. SARS-CoV-2-Related Subacute Thyroiditis, Myocarditis, and Hepatitis After Full Resolution of COVID-19 Serum Markers. *Am J Case Rep.* 2021;22:e932321.
4. Ippolito S, Dentali F, Tanda ML. SARS-CoV-2: a potential trigger for subacute thyroiditis? Insights from a case report. *J Endocrinol Invest.* 2020;43(8):1171-2.

5. Ünübol M, Erdemir Z, Çolak G, Ünsal MG, Güney E. Subacute thyroiditis associated with COVID-19 infection: Two case reports. *Turkish Journal of Endocrinology and Metabolism*. 2021;25(3):344-8.
6. Ayhan M, Guner R. A subacute thyroiditis case after SARS-CoV-2 infection: A case report and current literature review. *Haseki Tip Bulteni*. 2021;59:54-6.
7. Brancatella A, Viola N, Rutigliano G, Sgrò D, Santini F, Latrofa F. Subacute Thyroiditis During the SARS-CoV-2 Pandemic. *J Endocr Soc*. 2021;5(10):bvab130.
8. de la Higuera López-Frías M, Perdomo CM, Galofré JC. Subacute thyroiditis following COVID-19 infection. *Rev Clin Esp*. 2021;221(6):370-2.
9. Khatri A, Charlap E, Kim A. Subacute Thyroiditis from COVID-19 Infection: A Case Report and Review of Literature. *Eur Thyroid J*. 2021;9(6):324-8.
10. Ruano R, Zorzano-Martinez M, Campos A, Rius F, Hernández M. Subacute thyroiditis might be a complication triggered by SARS-CoV-2. *Endocrinol Diabetes Nutr (Engl Ed)*. 2020;68(10):755-6.
11. Baykan EK, Carlioglu A. Subacute Thyroiditis Secondary to SARS-CoV-2 Infection; Case Studies from Turkey. *Turkish Journal of Endocrinology and Metabolism*. 2021;25(2):232-7.
12. Abreu R, Miguel R, Saieg M. Subacute (De Quervain) thyroiditis during the COVID-19 pandemic. *Cancer Cytopathol*. 2021;129(11):844-6.
13. Mathews SE, Castellanos-Diaz J, Srihari A, Kadiyala S, Leey-Casella J, Ghayee HK, et al. Subacute Thyroiditis and Heart Failure in a Patient Presenting With COVID-19. *J Investig Med High Impact Case Rep*. 2021;9:23247096211009412.
14. Brancatella A, Ricci D, Viola N, Sgrò D, Santini F, Latrofa F. Subacute Thyroiditis After Sars-COV-2 Infection. *J Clin Endocrinol Metab*. 2020;105(7).
15. Chakraborty U, Ghosh S, Chandra A, Ray AK. Subacute thyroiditis as a presenting manifestation of COVID-19: a report of an exceedingly rare clinical entity. *BMJ Case Rep*. 2020;13(12).
16. Campos-Barrera E, Alvarez-Cisneros T, Davalos-Fuentes M. Subacute Thyroiditis Associated with COVID-19. *Case Rep Endocrinol*. 2020;2020:8891539.
17. Mattar SAM, Koh SJQ, Chandran SR, Cherng BPZ. Subacute thyroiditis associated with COVID-19. *Bmj Case Reports*. 2020;13(8).
18. Timofeeva LA, Aleksandrov YK, Aleshina TN, Yusova MA. Subacute thyroiditis associated with covid-19. *Russ Electron J Radiol*. 2021;11(3):15-24.
19. Guven M. Subacute thyroiditis in the course of coronavirus disease 2019: A case report. *J Endocrinol Metab*. 2020;10(3-4):110-2.

20. Chong WH, Shkolnik B, Saha B, Beegle S. Subacute Thyroiditis in the Setting of Coronavirus Disease 2019. *Am J Med Sci*. 2020.
21. Semikov VI, Aghayan DL, Shulutko AM, Khorobrykh TV, Aleksandrov YK, Mansurova GT, et al. Subacute thyroiditis after SARS-CoV-2 infection. *Clin Case Rep*. 2021.
22. Kong M, Sarah La P. Case Report: De Quervain's Thyroiditis as a Long-Term Sequelae Complication to SARS-CoV-2 Infection. *Case Reports in Acute Medicine*. 2021:64-70.
23. Tjønnfjord E, Moe RB, Ghanima W, Aballi S. Subacute thyroiditis after COVID-19. *Tidsskr Nor Laegeforen*. 2021;141(10).
24. Álvarez Martín MC, Del Peso Gilsanz C, Hernández López A. Subacute De Quervain thyroiditis after SARS-CoV-2 infection. *Endocrinol Diabetes Nutr (Engl Ed)*. 2020;68(10):754.
25. Davoodi L, Oladi Z, Jafarpour H, Zakariaei Z, Soleymani E, Razavi A. A 33-year-old man with COVID-19 presented with subacute thyroiditis: A rare case report and literature review. *New Microbes New Infect*. 2021;41:100871.
26. Stasiak M, Zawadzka-Starczewska K, Lewiński A. Clinical Manifestation of Subacute Thyroiditis Triggered by SARS-CoV-2 Infection Can Be HLA-Dependent. *Viruses*. 2021;13(12).
27. Brancatella A, Ricci D, Cappellani D, Viola N, Sgrò D, Santini F, et al. Is Subacute Thyroiditis an Underestimated Manifestation of SARS-CoV-2 Infection? Insights From a Case Series. *J Clin Endocrinol Metab*. 2020;105(10).
28. Sato D, Nishiguchi S, Tanaka E. Successful Management of Subacute Thyroiditis Following SARS-CoV-2 Infection. *Intern Med*. 2021;60(22):3573-6.
29. San Juan MDJ, Florencio MQV, Joven MH. SUBACUTE THYROIDITIS IN A PATIENT WITH CORONAVIRUS DISEASE 2019. *AACE Clin Case Rep*. 2020.
30. Ruggeri RM, Campennì A, Siracusa M, Frazzetto G, Gullo D. Subacute thyroiditis in a patient infected with SARS-COV-2: an endocrine complication linked to the COVID-19 pandemic. *Hormones (Athens)*. 2021;20(1):219-21.
31. Mehmood MA, Bapna M, Arshad M. A Case of Post-COVID-19 Subacute Thyroiditis. *Cureus*. 2020;12(12):e12301.
32. Seyed Resuli A, Bezgal M. Subacute Thyroiditis in COVID-19 Patients. *Ear Nose Throat J*. 2021:1455613211012114.
33. Bahçecioğlu AB, Karahan ZC, Aydoğan BI, Kalkan IA, Azap A, Erdoğan MF. Subacute thyroiditis during the COVID-19 pandemic: a prospective study. *J Endocrinol Invest*. 2022;45(4):865-74.
34. Elawady SS, Phuyal D, Shah RK, Mirza L. A Case of Subacute Thyroiditis following COVID-19 Infection. *Case Rep Endocrinol*. 2022;2022:2211061.

35. Jakovac H, Ferencic A, Stemberger C, Mohar Vitezic B, Cuculic D. Detection of Sars-Cov-2 antigens in thyroid gland showing histopathological features of subacute thyroiditis. *Eur Thyroid J*. 2022.
36. Salehi AM, Salehi H, Mohammadi HA, Afsar J. SARS-CoV-2 and Subacute Thyroiditis: A Case Report and Literature Review. *Case Rep Med*. 2022;2022:6013523.
37. Hajósi-Kalcakosz S, Dénes J, Góth M. Subacute thyroiditis associated with COVID-19 infection: a report of an increasing entity. *Arch Endocrinol Metab*. 2022;66(1):118-28.
38. Ashraf S, Imran MA, Ashraf S, Hafsa H-T, Khalid S, Akram MK, et al. COVID-19: A Potential Trigger for Thyroid Dysfunction. *The American journal of the medical sciences*. 2021;362(3):303-7.
39. Mondal S, Dasgupta R, Lodh M, Ganguly A. Subacute thyroiditis following recovery from COVID-19 infection: Novel clinical findings from an Eastern Indian cohort. *Postgraduate Medical Journal*. 2022.
40. Kliem T, Strobel D, Heinke F, Pavel M, Neurath MF, Neufert C. Case report: persistent fever after SARS-CoV-2 infection. *Internist*. 2022.
41. Al-Shammaa MS, Abdlkadir AS. A case of post COVID-19 subacute thyroiditis. *Clin Case Rep*. 2022;10(7):e6092.
42. Dolkar T, Jitidhar F, Patel MJ, Hamad AM, Salauddin F, Shiferaw-Deribe Z, et al. Painless Subacute Thyroiditis in a Patient With Acute COVID-19 Infection: A Transient Event. *Cureus*. 2022;14(7):e26924.
43. Poudel Jaishi P, Neupane SK, Neupane PK, Koirala D, Kandel A, Joshi K. Case report: Paradoxical manifestation of covid 19 induced thyroiditis in the unvaccinated patient. *Ann Med Surg (Lond)*. 2022;80:104204.
